# Supplementary material
Source: ML conference proceedings conference paper supplement (https://proceedings.neurips.cc/paper_files/paper/2023/hash/8249b30d877c91611fd8c7aa6ac2b5fe-Abstract.html)
Supplement: Supplementary file 1 [file 8249b30d877c91611fd8c7aa6ac2b5fe-Supplemental-Conference.pdf]

## A Proof of differential privacy

*Proof of Theorem 3.* Define the  $\ell_2$  **sensitivity** of any function  $g$  to be  $\Delta g = \sup_{S, S'} \|g(S) - g(S')\|_2$  where the supreme is over all neighboring  $(S, S')$ . Then the **Gaussian mechanism**  $\hat{g}(S) = g(S) + \sigma \Delta g \cdot \mathcal{N}(0, \mathbf{I})$ .

$\sigma$  denotes the “Noise multiplier”, which corresponds to the noise-level when a Gaussian mechanism is applied to a query with sensitivity 1.

Observe that automatic clipping (AUTO-V and AUTO-S (4.1)) ensures the bounded global-sensitivity of the stochastic gradient as in Abadi’s clipping. Aligning the noise-multiplier (rather than the noise-level itself) ensures that the the noise-to-sensitivity ratio  $\frac{\sigma \Delta g}{\Delta g} = \sigma$  is fixed regardless of  $\Delta g$ . The Gaussian mechanism’s privacy guarantees are equivalent. Thus from the privacy accountant perspective, DP-SGD with both Abadi’s clipping and our autoclipping method can be equivalently represented as the adaptive composition of  $T$  Poisson sampled Gaussian Mechanism with sampling probability  $B/n$  and noise multiplier  $\sigma$ .  $\square$

## B Proof of automaticity

### B.1 Non-adaptive DP optimizers

*Proof of Theorem 1.* We prove Theorem 1 by showing that, DP-SGD using  $R$ -dependent AUTO-S with learning rate  $\eta$  and weight decay  $\lambda$  is equivalent to  $R$ -independent AUTO-S with learning rate  $\eta R$  and weight decay  $\lambda/R$ . We claim other non-adaptive optimizers such as HeavyBall and NAG can be easily shown in a similar manner.

Recall the standard SGD with weight decay is

$$\mathbf{w}_{t+1} = \mathbf{w}_t - \eta \left( \sum_{i \in B_t} \frac{\partial l_i}{\partial \mathbf{w}_t} + \lambda \mathbf{w}_t \right)$$

Replacing the standard gradient  $\sum_i \frac{\partial l_i}{\partial \mathbf{w}_t}$  with the private gradient, we write the  $R$ -dependent case as

$$\begin{aligned} \mathbf{w}_{t+1} &= \mathbf{w}_t - \eta \left( \sum_{i \in B_t} \frac{\partial l_i}{\partial \mathbf{w}_t} \cdot R / \left\| \frac{\partial l_i}{\partial \mathbf{w}_t} \right\|_2 + \sigma R \cdot \mathcal{N}(0, \mathbf{I}) + \lambda \mathbf{w}_t \right) \\ &= \mathbf{w}_t - \eta R \left( \sum_{i \in B_t} \frac{\partial l_i}{\partial \mathbf{w}_t} / \left\| \frac{\partial l_i}{\partial \mathbf{w}_t} \right\|_2 + \sigma \cdot \mathcal{N}(0, \mathbf{I}) \right) - \eta \lambda \mathbf{w}_t \end{aligned}$$

which is clearly equivalent to the  $R$ -independent case:

$$\mathbf{w}_{t+1} = \mathbf{w}_t - \eta' \left( \sum_{i \in B_t} \frac{\partial l_i}{\partial \mathbf{w}_t} / \left\| \frac{\partial l_i}{\partial \mathbf{w}_t} \right\|_2 + \sigma \cdot \mathcal{N}(0, \mathbf{I}) + \lambda' \mathbf{w}_t \right)$$

if we use  $\eta' = \eta R$  and  $\lambda' = \lambda/R$ .  $\square$

### B.2 Adaptive DP optimizers

*Proof of Theorem 2.* We prove Theorem 2 by showing that, DP-AdamW using  $R$ -dependent AUTO-S with learning rate  $\eta$  and weight decay  $\lambda$  is equivalent to  $R$ -independent AUTO-S with the same learning rate  $\eta$  and weight decay  $\lambda/R$ . This is the most complicated case. We claim other adaptive optimizers such as AdaDelta, Adam with weight decay (not AdamW), and NAdam can be easily shown in a similar manner.

Recall the standard AdamW is

$$\mathbf{w}_{t+1} = \mathbf{w}_t - \eta \left( \frac{\mathbf{m}_t / (1 - \beta_1)}{\sqrt{\mathbf{v}_t / (1 - \beta_2)}} + \lambda \mathbf{w}_t \right)$$

where  $\beta_1, \beta_2$  are constants,  $\mathbf{g}_t := \sum_i \frac{\partial l_i}{\partial \mathbf{w}_t}$  is the standard gradient,

$$\mathbf{m}_t = \beta_1 \mathbf{m}_{t-1} + (1 - \beta_1) \mathbf{g}_t \longrightarrow \mathbf{m}_t = \sum_{\tau} \beta_1^{t-\tau} (1 - \beta_1) \mathbf{g}_{\tau},$$

$$\mathbf{v}_t = \beta_2 \mathbf{v}_{t-1} + (1 - \beta_2) \mathbf{g}_t^2 \longrightarrow \mathbf{v}_t = \sum_{\tau} \beta_2^{t-\tau} (1 - \beta_2) \mathbf{g}_{\tau}^2.$$

Replacing the standard gradient with the private gradient  $R\tilde{\mathbf{g}}_t := R(\sum_i \frac{\partial l_i}{\partial \mathbf{w}_t} / \|\frac{\partial l_i}{\partial \mathbf{w}_t}\|_2 + \sigma \cdot \mathcal{N}(0, \mathbf{I}))$ , we write the  $R$ -dependent DP-AdamW as

$$\mathbf{w}_{t+1} = \mathbf{w}_t - \eta \left( \frac{\tilde{\mathbf{m}}_t / (1 - \beta_1)}{\sqrt{\tilde{\mathbf{v}}_t / (1 - \beta_2)}} + \lambda \mathbf{w}_t \right)$$

where

$$\tilde{\mathbf{m}}_t = \beta_1 \tilde{\mathbf{m}}_{t-1} + (1 - \beta_1) R\tilde{\mathbf{g}}_t \longrightarrow \tilde{\mathbf{m}}_t = \sum_{\tau} \beta_1^{t-\tau} (1 - \beta_1) R\tilde{\mathbf{g}}_{\tau},$$

$$\tilde{\mathbf{v}}_t = \beta_2 \tilde{\mathbf{v}}_{t-1} + (1 - \beta_2) R^2 \tilde{\mathbf{g}}_t^2 \longrightarrow \tilde{\mathbf{v}}_t = \sum_{\tau} \beta_2^{t-\tau} (1 - \beta_2) R^2 \tilde{\mathbf{g}}_{\tau}^2.$$

Clearly, the  $R$  factor in the numerator and denominator of  $\frac{\tilde{\mathbf{m}}_t / (1 - \beta_1)}{\sqrt{\tilde{\mathbf{v}}_t / (1 - \beta_2)}}$  cancel each other. Therefore we claim that the  $R$ -dependent DP-AdamW is in fact completely independent of  $R$ .  $\square$

### B.3 Automatic per-layer clipping

In some cases, the per-layer clipping is desired, where we use a clipping threshold vector  $\mathbf{R} = [R_1, \dots, R_L]$  and each layer uses a different clipping threshold. We claim that DP optimizers under automatic clipping works with the per-layer clipping when  $\mathbf{R}$  is tuned proportionally, e.g.  $\mathbf{R} = R \cdot [a_1, \dots, a_L]$ , but not entry-wise (see counter-example in Fact B.1). One special case is the *uniform per-layer clipping* when  $R_1 = \dots = R_L = R/\sqrt{L}$ . This is widely applied as only one norm  $R$  requires tuning, instead of  $L$  norms in  $\mathbf{R}$ , particularly in the case of deep models with hundreds of layers. The corresponding DP-SGD with AUTO-S in (3.3) gives

$$\mathbf{w}_{t+1}^{(l)} = \mathbf{w}_t^{(l)} - \eta \left( \sum_{i \in B_t} \frac{R}{\sqrt{L}} \frac{\mathbf{g}_{t,i}^{(l)}}{\|\mathbf{g}_{t,i}^{(l)}\| + \gamma} + \sigma R \cdot \mathcal{N}(0, \mathbf{I}) \right)$$

Here the superscript  $(l)$  is the layer index. Clearly  $R$  couples with the learning rate  $\eta$  and the same analysis as in Theorem 1 follows. The adaptive optimizers can be similarly analyzed from Theorem 2. **Fact B.1.** Changing one clipping threshold in the clipping threshold vector  $\mathbf{R}$  (i.e. not proportionally) can break the coupling with learning rate.

*Proof of Fact B.1.* We prove by a counter-example of  $\mathbf{R}$  in  $\mathbb{R}^2$ . Consider DP-SGD with per-layer clipping thresholds  $(R_1, R_2) = (9, 12)$ :

$$\mathbf{w}_{t+1}^{(l)} = \mathbf{w}_t^{(l)} - \eta \left( \sum_{i \in B} \frac{R_l \mathbf{g}_{t,i,l}}{\|\mathbf{g}_{t,i,l}\|} + \sigma \sqrt{R_1^2 + R_2^2} \cdot \mathcal{N}(0, \mathbf{I}) \right)$$

Increasing  $R_1$  from 9 to 16 changes the update for the first layer

$$\eta \left( \sum_{i \in B} \frac{9 \mathbf{g}_{t,i,l}}{\|\mathbf{g}_{t,i,l}\|} + 15\sigma \cdot \mathcal{N}(0, 1) \right) \rightarrow \eta \left( \sum_{i \in B} \frac{16 \mathbf{g}_{t,i,l}}{\|\mathbf{g}_{t,i,l}\|} + 20\sigma \cdot \mathcal{N}(0, \mathbf{I}) \right)$$

The noise-to-signal ratio decreases from 5/3 to 5/4 for this layer, and increases from 5/4 to 5/3 for the second layer. This breaks the coupling with learning rate, since the coupling does not change the noise-to-signal ratio.  $\square$

## C Main results of convergence for DP-SGD with automatic clipping

### C.1 Main proof of convergence for DP-SGD (the envelope version)

*Proof of Theorem 4.* In this section, we prove two parts of Theorem 4.

The first part of Theorem 4 is the upper bound on  $\min_t \mathbb{E}(\|g_t\|)$ , which is a direct result following from Theorem 6, and we prove it in Appendix C.2.

**Theorem 6.** Under Assumption 5.1, 5.2, 5.3, running DP-SGD with automatic clipping for  $T$  iterations gives

$$\min_t \mathbb{E}(\|g_t\|) \leq \frac{\xi}{r} + \mathcal{F} \left( \frac{4}{\sqrt{T}} \sqrt{(\mathcal{L}_0 - \mathcal{L}_*)L \left( 1 + \frac{\sigma^2 d}{B^2} \right)}; r, \xi, \gamma \right) \quad (\text{C.1})$$

where

- for  $r < 1, \gamma = 0$  and  $\eta \propto 1/\sqrt{T}$ ,  $\mathcal{F}(x) = \frac{x}{\min_{0 < c < 1} f(c, r)}$  and  $f(c, r) := \frac{(1+rc)}{\sqrt{r^2+2rc+1}} + \frac{(1-rc)}{\sqrt{r^2-2rc+1}}$ ; for  $r \geq 1, \gamma = 0$  and  $\eta \propto 1/\sqrt{T}$ ,  $\mathcal{F}(x) = \infty$ ;
- for  $r \geq 1, \gamma > 0$  and  $\eta \propto 1/\sqrt{T}$ ,  $\mathcal{F}$  is the convex envelope of (C.8), and is strictly increasing.

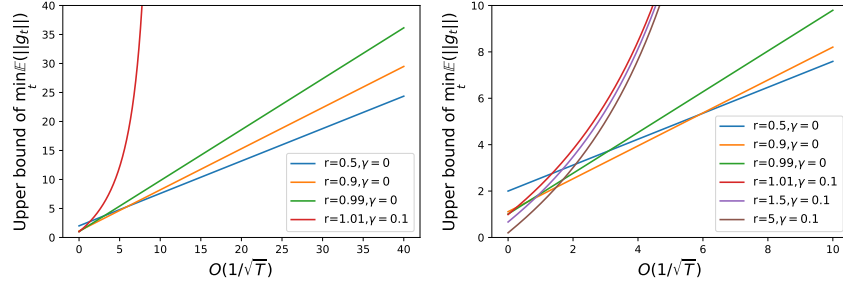

Figure 6: Visualization of upper bound  $\frac{\xi}{r} + \mathcal{F} \left( O(1/\sqrt{T}); r, \xi, \gamma \right)$  for gradient norm, with  $O(1/\sqrt{T})$  in (C.1). Here  $\xi = 1$ . The right plot is a zoom-in (with additional lines) of the left one.

Notice that, (C.1) holds for any  $r > 0$ . However, we have to consider an envelope curve over  $r$  in (C.1) to reduce the upper bound: with AUTO-V clipping ( $\gamma = 0$ ), the upper bound in (C.1) is always larger than  $\xi$  as  $r < 1$ ; we must use AUTO-S clipping ( $\gamma > 0$ ) to reduce the upper bound to zero, as can be seen from Figure 6. In fact, larger  $T$  needs larger  $r$  to reduce the upper bound.

All in all, we specifically focus on  $r \geq 1$  and  $\gamma > 0$ , which is the only scenario that (C.1) can converge to zero. This scenario is also where we prove the second part of Theorem 4.

The second part of Theorem 4 is the asymptotic convergence rate  $O(T^{-1/4})$  of DP-SGD, only possible under  $r \geq 1$  and  $\gamma > 0$ .

By (C.1) in Theorem 6, our upper bound  $\mathcal{G}$  from Theorem 4 can be simplified to

$$\min_{r > 0} \frac{\xi}{r} + (\mathcal{M}^{-1})_{ccv} \left( \frac{4}{\sqrt{T}} \sqrt{(\mathcal{L}_0 - \mathcal{L}_*)L \left( 1 + \frac{\sigma^2 d}{B^2} \right)}; r, \xi, \gamma \right)$$

where the function  $\mathcal{M}^{-1}$  is explicitly defined in (C.8) and the subscript  $ccv$  means the upper concave envelope. Clearly, as  $T \rightarrow \infty$ ,  $\mathcal{M}^{-1}(\frac{1}{\sqrt{T}}) \rightarrow 0$ . We will next show that the convergence rate of  $\mathcal{M}^{-1}$  is indeed  $O(\frac{1}{\sqrt{T}})$  and the minimization over  $r$  makes the overall convergence rate  $O(T^{-1/4})$ .

597 Starting from (C.8), we denote  $x = \frac{4}{\sqrt{T}} \sqrt{(\mathcal{L}_0 - \mathcal{L}_*)L(1 + \frac{\sigma^2 d}{B^2})}$  and write

$$\begin{aligned}
\mathcal{M}^{-1}(x; r, \xi, \gamma) &= \frac{-\frac{\xi}{r}\gamma + (r^2 - 1)\frac{\xi}{r}x + r\gamma x + \gamma\sqrt{(\frac{\xi}{r})^2 + 2\xi x + 2\gamma x + x^2}}{2\gamma - (r^2 - 1)x} \\
&= \left( -\frac{\gamma\xi}{r} + (r^2 - 1)\frac{\xi}{r}x + r\gamma x + \gamma\sqrt{(\frac{\xi}{r})^2 + 2\xi x + 2\gamma x + x^2} \right) \\
&\quad \cdot \frac{1 + \frac{r^2 - 1}{2\gamma}x + O(x^2)}{2\gamma} \\
&= \frac{1}{2\gamma} \left( -\frac{\gamma\xi}{r} + (r^2 - 1)\frac{\xi}{r}x + r\gamma x + \frac{\gamma\xi}{r} \sqrt{1 + \frac{2(\xi + \gamma)r^2 x}{\xi^2} + O(x^2)} \right) \\
&\quad \cdot \left( 1 + \frac{r^2 - 1}{2\gamma}x + O(x^2) \right) \\
&= \frac{1}{2\gamma} \left( -\frac{\gamma\xi}{r} + (r^2 - 1)\frac{\xi}{r}x + r\gamma x + \frac{\gamma\xi}{r} \left( 1 + \frac{(\xi + \gamma)r^2 x}{\xi^2} + O(x^2) \right) \right) \\
&\quad \cdot \left( 1 + \frac{r^2 - 1}{2\gamma}x + O(x^2) \right) \\
&= \frac{1}{2\gamma} \left( (r^2 - 1)\frac{\xi}{r}x + r\gamma x + \frac{\gamma(\xi + \gamma)r x}{\xi} + O(x^2) \right) \cdot \left( 1 + \frac{r^2 - 1}{2\gamma}x + O(x^2) \right) \\
&= \frac{1}{2\gamma} \left( (r^2 - 1)\frac{\xi}{r} + r\gamma + \frac{\gamma(\xi + \gamma)r}{\xi} \right) \cdot x + O(x^2) \\
&= \frac{1}{2\gamma} \left( \frac{(\xi + \gamma)^2}{\xi} r - \frac{\xi}{r} \right) \cdot x + O(x^2)
\end{aligned}$$

Since  $\mathcal{M}^{-1}$  is asymptotically linear as  $x \rightarrow 0$ , we instead study

$$\min_{r>0} \frac{\xi}{r} + \mathcal{M}^{-1}(x; r, \xi, \gamma) \equiv \min_{r>0} \frac{\xi}{r} + \frac{1}{2\gamma} \left( \frac{(\xi + \gamma)^2}{\xi} r - \frac{\xi}{r} \right) \cdot x + O(x^2).$$

598 That is, ignoring the higher order term for the asymptotic analysis, the  $\mathcal{M}^{-1}$  part converges as  
599  $O(x) = O(1/\sqrt{T})$ , and we visualize this in Figure 8.

Although DP-SGD converges faster than SGD, the former converges to  $\xi/r$  and the latter converges to 0. Thus, taking  $\xi/r$  into consideration, the objective reduces to a hyperbola

$$\frac{\left(\xi(1 - \frac{x}{2\gamma})\right)}{r} + \frac{x(\xi + \gamma)^2}{2\gamma\xi} \cdot r$$

600 whose minimum over  $r$  is obviously  $2\sqrt{\xi(1 - \frac{x}{2\gamma})\frac{x(\xi + \gamma)^2}{2\gamma\xi}} = O(\sqrt{x}) = O(T^{-1/4})$ .  $\square$

601 To give more details about the upper bound in (5.2), we demonstrate its dependence on  $\xi$  and  $\gamma$  in  
602 Figure 7.

## 603 C.2 Main proof of convergence for DP-SGD (the non-envelope version)

*Proof of Theorem 6.* Consider DP-SGD with AUTO-S clipping

$$\mathbf{w}_{t+1} = \mathbf{w}_t - \eta \left( \sum_i \frac{\tilde{\mathbf{g}}_{t,i}}{\|\tilde{\mathbf{g}}_{t,i}\| + \gamma} + \sigma \mathcal{N}(0, \mathbf{I}) \right)$$

604 where  $\tilde{\mathbf{g}}_{t,i}$  is i.i.d. samples of  $\tilde{\mathbf{g}}_t$ , an unbiased estimate of  $\mathbf{g}_t$ , with a bounded variance as described in  
605 Assumption 5.3.

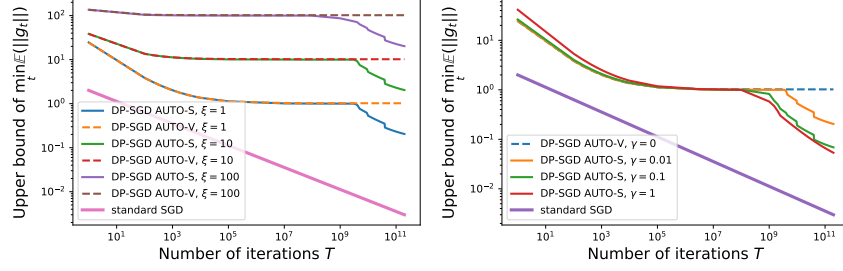

Figure 7: Dependence of the upper bound  $\mathcal{G}$  on  $\xi$  (left) and  $\gamma$  (right). Here the  $O(1/\sqrt{T})$  term is set to 10 and either  $\gamma = 0.01$  (left) or  $\xi = 1$  (right).

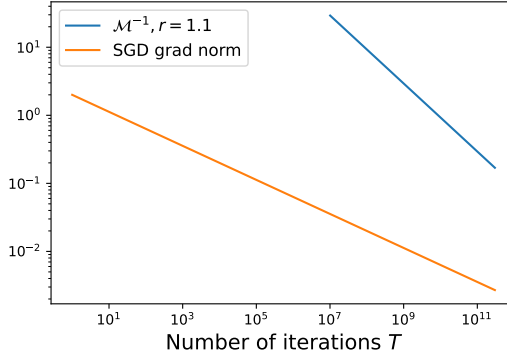

Figure 8: Convergence with respect to  $T$ . Same setting as Figure 5.

606 By Lipschitz smoothness in Assumption 5.2, and denoting  $Z = \mathcal{N}(0, \mathbf{I})$ , we have

$$\begin{aligned}
 \mathcal{L}_{t+1} - \mathcal{L}_t &\leq \mathbf{g}_t^\top (\mathbf{w}_{t+1} - \mathbf{w}_t) + \frac{L}{2} \|\mathbf{w}_{t+1} - \mathbf{w}_t\|^2 \\
 &= -\eta \mathbf{g}_t^\top \left( \sum_i \frac{\tilde{\mathbf{g}}_{t,i}}{\|\tilde{\mathbf{g}}_{t,i}\| + \gamma} + \sigma Z \right) + \frac{L\eta^2}{2} \left\| \sum_i \frac{\tilde{\mathbf{g}}_{t,i}}{\|\tilde{\mathbf{g}}_{t,i}\| + \gamma} + \sigma Z \right\|^2 \\
 &\leq -\eta \mathbf{g}_t^\top \left( \sum_i \frac{\tilde{\mathbf{g}}_{t,i}}{\|\tilde{\mathbf{g}}_{t,i}\| + \gamma} + \sigma Z \right) \\
 &\quad + L\eta^2 \left( \left\| \sum_i \frac{\tilde{\mathbf{g}}_{t,i}}{\|\tilde{\mathbf{g}}_{t,i}\| + \gamma} \right\|^2 + \sigma^2 \|Z\|^2 \right)
 \end{aligned}$$

607 where the last inequality follows from Cauchy Schwartz.

608 Given the fact that  $\|\tilde{\mathbf{g}}_{t,i}/(\|\tilde{\mathbf{g}}_{t,i}\| + \gamma)\| \leq 1$ , the expected improvement at one iteration is

$$\begin{aligned}
 \mathbb{E}(\mathcal{L}_{t+1} - \mathcal{L}_t | \mathbf{w}_t) &\leq -\eta \mathbf{g}_t^\top \mathbb{E} \left( \sum_i \frac{\tilde{\mathbf{g}}_{t,i}}{\|\tilde{\mathbf{g}}_{t,i}\| + \gamma} \right) + L\eta^2 (B^2 + \sigma^2 d) \\
 &= -\eta B \mathbf{g}_t^\top \mathbb{E} \left( \frac{\tilde{\mathbf{g}}_t}{\|\tilde{\mathbf{g}}_t\| + \gamma} \right) + L\eta^2 (B^2 + \sigma^2 d)
 \end{aligned} \tag{C.2}$$

609 Now we want to lower bound  $\mathbf{g}_t^\top \mathbb{E} \left( \frac{\tilde{\mathbf{g}}_t}{\|\tilde{\mathbf{g}}_t\| + \gamma} \right)$  in (C.2).

610 Write  $\tilde{\mathbf{g}}_t = \mathbf{g}_t + \Delta_t$  where the gradient noise  $\Delta_t$  follows  $\mathbb{E}\Delta_t = 0, \mathbb{E}\|\Delta_t\| < \xi$  by Assumption 5.3.  
 611 Then

$$\begin{aligned} \mathbf{g}_t^\top \mathbb{E} \left( \frac{\tilde{\mathbf{g}}_t}{\|\tilde{\mathbf{g}}_t\| + \gamma} \right) &= \mathbb{E} \left( \frac{\|\mathbf{g}_t\|^2 + \mathbf{g}_t^\top \Delta_t}{\|\mathbf{g}_t + \Delta_t\| + \gamma} \right) \\ &= \frac{1}{2} \mathbb{E} \left( \frac{\|\mathbf{g}_t\|^2 + \mathbf{g}_t^\top \Delta_t}{\|\mathbf{g}_t + \Delta_t\| + \gamma} \middle| \Delta_t \in H_+ \right) + \frac{1}{2} \mathbb{E} \left( \frac{\|\mathbf{g}_t\|^2 + \mathbf{g}_t^\top \Delta_t}{\|\mathbf{g}_t + \Delta_t\| + \gamma} \middle| \Delta_t \in H_- \right) \\ &= \frac{1}{2} \mathbb{E} \left( \frac{\|\mathbf{g}_t\|^2 + \mathbf{g}_t^\top \Delta_t}{\|\mathbf{g}_t + \Delta_t\| + \gamma} \middle| \Delta_t \in H_+ \right) + \frac{1}{2} \mathbb{E} \left( \frac{\|\mathbf{g}_t\|^2 - \mathbf{g}_t^\top \Delta_t}{\|\mathbf{g}_t - \Delta_t\| + \gamma} \middle| \Delta_t \in H_+ \right) \end{aligned}$$

612 where we use the hyperplane perpendicular to  $\mathbf{g}_t$  to divide the support of  $\Delta_t$  into two half-spaces:

$$H_+ := \{\mathbf{v} : \mathbf{g}_t^\top \mathbf{v} > 0\}, \quad H_- := \{\mathbf{v} : \mathbf{g}_t^\top \mathbf{v} < 0\}.$$

We use the symmetry assumption in Assumption 5.3 to get

$$\mathbb{P}(\Delta_t \in H_+) = \mathbb{P}(\Delta_t \in H_-) = \frac{1}{2}$$

613 and notice that  $\Delta_t \stackrel{D}{=} -\Delta_t$ , i.e., if  $\Delta_t \in H_+$ , then  $-\Delta_t \in H_-$  with the same distribution.

614 The next result further gives a lower bound for  $\mathbf{g}_t^\top \mathbb{E} \left( \frac{\tilde{\mathbf{g}}_t}{\|\tilde{\mathbf{g}}_t\| + \gamma} \right)$  using  $\|\mathbf{g}_t\|$ .

**Lemma C.1.**

$$\mathbb{E} \left( \frac{\|\mathbf{g}_t\|^2 + \mathbf{g}_t^\top \Delta_t}{\|\mathbf{g}_t + \Delta_t\| + \gamma} + \frac{\|\mathbf{g}_t\|^2 - \mathbf{g}_t^\top \Delta_t}{\|\mathbf{g}_t - \Delta_t\| + \gamma} \middle| \Delta_t \in H_+ \right) \geq \min_{0 < c \leq 1} f(c, r; \frac{\gamma}{\|\mathbf{g}_t\|}) \cdot (\|\mathbf{g}_t\| - \xi/r)$$

615 for any  $r > 0$  and  $f(c, r; \Gamma) = \frac{(1+rc)}{\sqrt{r^2+2rc+1+\Gamma}} + \frac{(1-rc)}{\sqrt{r^2-2rc+1+\Gamma}}$ .

616 For the simplicity of notation, we denote the distance measure

$$\mathcal{M}(\|\mathbf{g}_t\| - \xi/r; r, \xi, \gamma) = \min_{0 < c \leq 1} f \left( c, r; \frac{\gamma}{\|\mathbf{g}_t\|} \right) \cdot (\|\mathbf{g}_t\| - \xi/r) \quad (\text{C.3})$$

617 and leave the fine-grained analysis (e.g. its explicit form in some scenarios) at the end of this section.

618 Using the lower bound from Lemma C.1, the expected improvement (C.2) becomes

$$\mathbb{E}(\mathcal{L}_{t+1} - \mathcal{L}_t | \mathbf{w}_t) \leq -\frac{\eta B}{2} \mathcal{M}(\|\mathbf{g}_t\| - \xi/r) + L\eta^2 B^2 \left( 1 + \frac{\sigma^2 d}{B^2} \right)$$

619 Now extend the expectation over randomness in the trajectory, and perform a telescoping sum over  
 620 the iterations

$$\begin{aligned} \mathcal{L}_0 - \mathcal{L}_* &\geq \mathcal{L}_0 - \mathbb{E}\mathcal{L}_T = \sum_t \mathbb{E}(\mathcal{L}_t - \mathcal{L}_{t+1}) \\ &\geq \frac{\eta B}{2} \mathbb{E} \left( \sum_t \mathcal{M}(\|\mathbf{g}_t\| - \xi/r) \right) - TL\eta^2 B^2 \left( 1 + \frac{\sigma^2 d}{B^2} \right) \end{aligned}$$

621 Substituting  $\eta B = \eta_0/\sqrt{T}$  where  $\eta_0$  is a base learning rate, we have

$$2(\mathcal{L}_0 - \mathcal{L}_*) \geq \sqrt{T}\eta_0 \mathbb{E} \left( \frac{1}{T} \sum_t \mathcal{M}(\|\mathbf{g}_t\| - \xi/r) \right) - 2L\eta_0^2 \left( 1 + \frac{\sigma^2 d}{B^2} \right)$$

622 and finally

$$\mathbb{E} \left( \frac{1}{T} \sum_t \mathcal{M}(\|\mathbf{g}_t\| - \xi/r) \right) \leq \frac{1}{\sqrt{T}} \left[ \frac{2(\mathcal{L}_0 - \mathcal{L}_*)}{\eta_0} + 2L\eta_0 \left( 1 + \frac{\sigma^2 d}{B^2} \right) \right] \quad (\text{C.4})$$

623 With  $\eta_0$  chosen properly at  $\eta_0 = \sqrt{\frac{\mathcal{L}_0 - \mathcal{L}_*}{L(1 + \frac{\sigma^2 d}{B^2})}}$ , the hyperbola on the right hand side in (C.4) is  
 624 minimized to  $4\sqrt{(\mathcal{L}_0 - \mathcal{L}_*)L(1 + \frac{\sigma^2 d}{B^2})}$ , and we obtain

$$\mathbb{E} \left( \frac{1}{T} \sum_t \mathcal{M}(\|g_t\| - \xi/r) \right) \leq \frac{4}{\sqrt{T}} \sqrt{(\mathcal{L}_0 - \mathcal{L}_*)L \left( 1 + \frac{\sigma^2 d}{B^2} \right)}$$

625 Since the minimum of a sequence is smaller than the average, we have

$$\min_t \mathbb{E}(\mathcal{M}(\|g_t\| - \xi/r)) \leq \frac{1}{T} \sum_t \mathbb{E}(\mathcal{M}(\|g_t\| - \xi/r)) \leq \frac{4}{\sqrt{T}} \sqrt{(\mathcal{L}_0 - \mathcal{L}_*)L \left( 1 + \frac{\sigma^2 d}{B^2} \right)} \quad (\text{C.5})$$

626 We claim that  $\mathcal{M}$  may not be concave or convex. Therefore we use  $\mathcal{M}_{cvx}$  to denote its lower convex  
 627 envelope, i.e. the largest convex function that is smaller than  $\mathcal{M}$ . Then by Jensen's inequality (C.5)  
 628 becomes

$$\min_t \mathcal{M}_{cvx}(\mathbb{E}(\|g_t\| - \xi/r)) \leq \min_t \mathbb{E}(\mathcal{M}_{cvx}(\|g_t\| - \xi/r)) \leq \frac{4}{\sqrt{T}} \sqrt{(\mathcal{L}_0 - \mathcal{L}_*)L \left( 1 + \frac{\sigma^2 d}{B^2} \right)} \quad (\text{C.6})$$

629 It is obvious that  $\mathcal{M}_{cvx}$  is increasing as  $\mathcal{M}$  is increasing by Theorem 8. Hence,  $(\mathcal{M}_{cvx})^{-1}$  is also  
 630 increasing, as the inverse of  $\mathcal{M}_{cvx}$ . We write (C.6) as

$$\min_t \mathbb{E}(\|g_t\| - \xi/r) \leq (\mathcal{M}_{cvx})^{-1} \left( \frac{4}{\sqrt{T}} \sqrt{(\mathcal{L}_0 - \mathcal{L}_*)L \left( 1 + \frac{\sigma^2 d}{B^2} \right)} \right)$$

631 and equivalently

$$\min_t \mathbb{E}(\|g_t\|) \leq \frac{\xi}{r} + (\mathcal{M}_{cvx})^{-1} \left( \frac{4}{\sqrt{T}} \sqrt{(\mathcal{L}_0 - \mathcal{L}_*)L \left( 1 + \frac{\sigma^2 d}{B^2} \right)} \right) \quad (\text{C.7})$$

632 Finally, we derive the explicit properties of  $\mathcal{M}(\|g_t\| - \xi/r)$  in Theorem 8. These properties allow  
 633 us to further analyze on the convergence of  $\mathcal{M}(\|g_t\| - \xi/r)$ , based on AUTO-V and AUTO-S,  
 634 respectively.

**1. DP-SGD with AUTO-V clipping.** By Theorem 8, we write

$$\mathcal{M}(x; r) = \min_{c \in (0, 1]} f(c, r; 0) \cdot x$$

635 This is a linear function and thus  $\mathcal{M}_{cvx} = \mathcal{M} = 1/\mathcal{M}_{cvx}^{-1}$ . As a result, we have

$$\min_t \mathbb{E}(\|g_t\|) \leq \frac{\xi}{r} + \frac{1}{\min_{c \in (0, 1]} f(c, r; 0)} \cdot \frac{4}{\sqrt{T}} \sqrt{(\mathcal{L}_0 - \mathcal{L}_*)L \left( 1 + \frac{\sigma^2 d}{B^2} \right)}$$

636 We note here  $r$  plays an important role under AUTO-V clipping: when  $r < 1$ , we spend more iterations  
 637 to converge to better and smaller gradient norm  $\xi/r$ ; when  $r \geq 1$ ,  $\min_c f(c, r; 0) = f(1, r; 0) = 0$   
 638 and it takes forever to converge. This is demonstrated in the left plot of Figure 5.

**2. DP-SGD with AUTO-S clipping.** By Theorem 8 and for  $r > 1$ , we write

$$\mathcal{M}(x; r, \xi, \gamma) = \left( \frac{\gamma}{(r-1)(x + \xi/r) + \gamma} - \frac{\gamma}{(r+1)(x + \xi/r) + \gamma} \right) \cdot x.$$

639 Notice that the inverse of a lower convex envelope is equivalent to the upper concave envelope  
 640 (denoted by the subscript  $ccv$ ) of an inverse. Therefore we can derive  $(\mathcal{M}_{cvx})^{-1} = (\mathcal{M}^{-1})_{ccv}$  with  
 641 the explicit form

$$\mathcal{M}^{-1}(x; r, \xi, \gamma) = \frac{-\frac{\xi}{r}\gamma + (r^2 - 1)\frac{\xi}{r}x + r\gamma x + \gamma\sqrt{(\frac{\xi}{r})^2 + 2\xi x + 2\gamma x + x^2}}{2\gamma - (r^2 - 1)x}. \quad (\text{C.8})$$

642 we can derive it based on  $r, \xi, \gamma$  and substitute back to (C.7).

643 Note that the domain of  $\mathcal{M}^{-1}$  (or the image of  $\mathcal{M}$ ) is  $[0, \frac{\gamma}{r-1} - \frac{\gamma}{r+1}]$ .

644 In comparison to the AUTO-V clipping,  $\mathcal{M}^{-1}$  takes a much more complicated form, as depicted in  
 645 the middle plot of Figure 5, where  $r > 1$  plays an important role for the gradient norm to converge to  
 646 zero.  $\square$

### 647 C.3 Proof of Lemma C.1

648 *Proof of Lemma C.1.* We want to lower bound

$$\mathbb{E} \left( \frac{\|\mathbf{g}_t\|^2 + \mathbf{g}_t^\top \Delta_t}{\|\mathbf{g}_t + \Delta_t\| + \gamma} + \frac{\|\mathbf{g}_t\|^2 - \mathbf{g}_t^\top \Delta_t}{\|\mathbf{g}_t - \Delta_t\| + \gamma} \middle| \Delta_t \in H_+ \right) \quad (\text{C.9})$$

649 To simplify the notation, we denote noise-to-signal ratio  $S := \frac{\|\Delta_t\|}{\|\mathbf{g}_t\|}$  and  $c := \cos \theta = \frac{\mathbf{g}_t^\top \Delta_t}{\|\mathbf{g}_t\| \|\Delta_t\|}$ , with  
 650  $\theta$  be the random angle between  $\mathbf{g}_t$  and  $\Delta_t$ . Note that  $0 < c \leq 1$  when  $\Delta_t \in H_+$ .

651 The term inside the conditional expectation in (C.9) can be written as

$$\begin{aligned} & \frac{(1+Sc)\|\mathbf{g}_t\|^2}{\sqrt{S^2+2Sc+1}\|\mathbf{g}_t\|+\gamma} + \frac{(1-Sc)\|\mathbf{g}_t\|^2}{\sqrt{S^2-2Sc+1}\|\mathbf{g}_t\|+\gamma} \\ &= \|\mathbf{g}_t\| \left( \frac{(1+Sc)}{\sqrt{S^2+2Sc+1}+\gamma/\|\mathbf{g}_t\|} + \frac{(1-Sc)}{\sqrt{S^2-2Sc+1}+\gamma/\|\mathbf{g}_t\|} \right) \end{aligned}$$

652 Defining  $\Gamma = \gamma/\|\mathbf{g}_t\|$  and

$$f(c, S; \Gamma) := \frac{(1+Sc)}{\sqrt{S^2+2Sc+1}+\Gamma} + \frac{(1-Sc)}{\sqrt{S^2-2Sc+1}+\Gamma}, \quad (\text{C.10})$$

653 we turn the conditional expectation in (C.9) into

$$\mathbb{E} \left( \frac{\|\mathbf{g}_t\|^2 + \mathbf{g}_t^\top \Delta_t}{\|\mathbf{g}_t + \Delta_t\| + \gamma} + \frac{\|\mathbf{g}_t\|^2 - \mathbf{g}_t^\top \Delta_t}{\|\mathbf{g}_t - \Delta_t\| + \gamma} \middle| \Delta_t \in H_+ \right) = \|\mathbf{g}_t\| \mathbb{E}(f(c, S; \Gamma) | \Delta_t \in H_+) \quad (\text{C.11})$$

654 for which we want to lower bound  $f(c, S; \Gamma)$  over  $0 < c \leq 1, S > 0, \Gamma > 0$ . We use the next theorem  
 655 to prepare some helpful properties. The proof can be found in Appendix E.1.

656 **Theorem 7.** For  $f$  defined in (C.10), we have

- 657 1.  $f(c, S; \Gamma)$  is strictly decreasing in  $S$  for all  $0 < c < 1$  and  $\Gamma > 0$ .
- 658 2. Consequently,  $\min_{c \in (0,1)} f(c, S; \Gamma)$  is strictly decreasing in  $S$ .
- 659 3.  $f(c, S; \Gamma)$  is strictly decreasing in  $c$  for all  $S > 1$  and  $\Gamma > 0$ .

660 We consider a thresholding ratio  $r > 0$  and we will focus on the regime that  $S < r$ . This  $r$  will turn  
 661 out to measure the minimum gradient norm at convergence: informally speaking,  $\|\mathbf{g}_t\|$  converges to  
 662  $\xi/r$ .

663 By the law of total expectation, (C.11) can be relaxed as follows.

$$\begin{aligned}
& \|g_t\| \mathbb{E} \left( f(c, S; \Gamma) \middle| \Delta \in H_+ \right) \\
&= \|g_t\| \mathbb{E} \left( f(c, S; \Gamma) \middle| \Delta \in H_+, S < r \right) \mathbb{P}(r\|g_t\| > \|\Delta\| \middle| \Delta \in H_+) \\
&\quad + \|g_t\| \mathbb{E} \left( f(c, S; \Gamma) \middle| \Delta \in H_+, S > r \right) \mathbb{P}(r\|g_t\| < \|\Delta\| \middle| \Delta \in H_+) \\
&\geq \|g_t\| \mathbb{E} \left( f(c, S; \Gamma) \middle| \Delta \in H_+, S < r \right) \mathbb{P}(r\|g_t\| > \|\Delta\| \middle| \Delta \in H_+) \tag{C.12} \\
&\geq \|g_t\| \mathbb{E} \left( f(c, r; \Gamma) \middle| \Delta \in H_+, S < r \right) \mathbb{P}(r\|g_t\| > \|\Delta\| \middle| \Delta \in H_+) \\
&= \|g_t\| \mathbb{E} \left( f(c, r; \Gamma) \middle| \Delta \in H_+, S < r \right) \mathbb{P}(r\|g_t\| > \|\Delta\|) \\
&\geq \min_{c \in (0,1]} f(c, r; \Gamma) \cdot \underbrace{\|g_t\| \mathbb{P}(r\|g_t\| > \|\Delta\|)}_{\star}
\end{aligned}$$

664 where in the first inequality, the ignoring of last term is justified by  $f(c, S; \Gamma) \geq$   
665  $\min_{c \in (0,1]} f(c, S; \Gamma) \geq \min_{c \in (0,1]} f(c, \infty; \Gamma) = 0$ , from the monotonicity (second statement) in  
666 Theorem 7.

We first lower bound  $\star$  by applying the Markov's inequality:

$$\mathbb{P}(r\|g_t\| > \|\Delta_t\|) \geq 1 - \frac{\mathbb{E}\|\Delta_t\|}{r\|g_t\|}$$

and hence by Assumption 5.3,

$$\|g_t\| \mathbb{P}(r\|g_t\| > \|\Delta_t\|) \geq \|g_t\| - \mathbb{E}\|\Delta\|/r \geq \|g_t\| - \xi/r.$$

667 Finally, the conditional expectation of interest in (C.9) gives

$$\mathbb{E} \left( \frac{\|g_t\|^2 + g_t^\top \Delta_t}{\|g_t + \Delta_t\|} + \frac{\|g_t\|^2 - g_t^\top \Delta_t}{\|g_t - \Delta_t\|} \middle| \Delta_t \in H_+ \right) \geq \min_{0 < c \leq 1} f(c, r; \frac{\gamma}{\|g_t\|}) \cdot (\|g_t\| - \xi/r)$$

668 □

#### 669 C.4 Proof of Theorem 8

670 To derive some properties of  $\min_c f(c, r; \Gamma)$ , we need to compute separately for AUTO-V (without  
671 the stability constant,  $\Gamma = 0$ ) and for AUTO-S (with the stability constant,  $\Gamma > 0$ ), as shown in  
672 Theorem 8. As we will show, as the number of training iterations  $T \rightarrow \infty$ , DP-SGD with AUTO-V  
673 clipping can only compress  $\|g_t\|$  to  $\xi/r$  for  $r < 1$ . However, DP-SGD with AUTO-S clipping can  
674 compress  $\|g_t\|$  to  $\xi/r$  to any  $r > 1$ .

675 **Theorem 8.**

1. For  $0 < r < 1$  and  $\Gamma = 0$ , we have  $\min_{c \in (0,1]} f(c, r; 0) > 0$ . Then Equation (C.11) is lower bounded by

$$\min_{c \in (0,1]} f(c, r; 0) \cdot (\|g_t\| - \xi/r)$$

676 which is increasing in  $\|g_t\| - \xi/r$ .

- 677 2. For  $r \geq 1$  and  $\Gamma = 0$ , we have  $\min_{c \in (0,1]} f(c, r; \Gamma) = f(1, r; 0) = 0$ . In words, (C.9) has a  
678 trivial lower bound and Theorem 6 cannot compress  $\|g_t\|$  to  $\xi/r$ .

3. For  $r \geq 1$  and  $\Gamma > 0$ , we have  $\min_{c \in (0,1]} f(c, r; \Gamma) = f(1, r; \Gamma) = \left( \frac{\Gamma}{r+\Gamma-1} - \frac{\Gamma}{r+\Gamma+1} \right)$ . Then Equation (C.11) is lower bounded by

$$\left( \frac{\gamma}{(r-1)\|g_t\| + \gamma} - \frac{\gamma}{(r+1)\|g_t\| + \gamma} \right) \cdot (\|g_t\| - \xi/r)$$

679 which is increasing in  $\|g_t\| - \xi/r$ .

680 *Proof.* To prove statement 1, we use the second statement from Theorem 7 and show that  
681  $\min_c f(c, r; 0) > \min_c f(c, \infty; 0) = 0$ . To prove statement 2 and 3, we use the third statement from  
682 Theorem 7 and see that  $\min_c f(c, r; \Gamma) = f(1, r; \Gamma)$  with an explicit formula. □

## D Convergence rate of standard SGD

**Theorem 9.** Under Assumption 5.1, 5.2, 5.3 (without the symmetry assumption), running the standard non-DP SGD for  $T$  iterations gives, for  $\eta \propto 1/\sqrt{T}$ ,

$$\min_t \mathbb{E}(\|\mathbf{g}_t\|) \leq \frac{1}{T^{1/4}} \sqrt{2(\mathcal{L}_0 - \mathcal{L}_*)L + \frac{\xi^2}{B}}$$

*Proof of Theorem 9.* Consider the standard SGD

$$\mathbf{w}_{t+1} = \mathbf{w}_t - \eta \frac{\sum_i \tilde{\mathbf{g}}_{t,i}}{B}$$

where  $\tilde{\mathbf{g}}_{t,i}$  is i.i.d. unbiased estimate of  $\mathbf{g}_t$ , with a bounded variance as described in Assumption 5.3.

By Lipschitz smoothness assumption in Assumption 5.2,

$$\mathcal{L}_{t+1} - \mathcal{L}_t \leq \mathbf{g}_t^\top (\mathbf{w}_{t+1} - \mathbf{w}_t) + \frac{L}{2} \|\mathbf{w}_{t+1} - \mathbf{w}_t\|^2 = -\eta \mathbf{g}_t^\top \left( \sum_i \frac{1}{B} \tilde{\mathbf{g}}_{t,i} \right) + \frac{L\eta^2}{2} \left\| \sum_i \frac{1}{B} \tilde{\mathbf{g}}_{t,i} \right\|^2$$

The expected improvement at one iteration is

$$\begin{aligned} \mathbb{E}(\mathcal{L}_{t+1} - \mathcal{L}_t | \mathbf{w}_t) &\leq -\eta \mathbf{g}_t^\top \mathbb{E} \tilde{\mathbf{g}}_{t,i} + \frac{L\eta^2}{2} \mathbb{E} \left\| \sum_i \frac{1}{B} \tilde{\mathbf{g}}_{t,i} \right\|^2 \\ &\leq -\eta \|\mathbf{g}_t\|^2 + \frac{L\eta^2}{2} \left( \|\mathbf{g}_t\|^2 + \frac{\xi^2}{B} \right) \end{aligned} \quad (\text{D.1})$$

Now we extend the expectation over randomness in the trajectory, and perform a telescoping sum over the iterations

$$\mathcal{L}_0 - \mathcal{L}_* \geq \mathcal{L}_0 - \mathbb{E} \mathcal{L}_T = \sum_t \mathbb{E}(\mathcal{L}_t - \mathcal{L}_{t+1}) \geq \left( \eta - \frac{L\eta^2}{2} \right) \mathbb{E} \left( \sum_t \|\mathbf{g}_t\|^2 \right) - \frac{TL\eta^2 \xi^2}{2B}$$

Notice that we do not need the symmetry assumption in Assumption 5.3 in the non-DP SGD analysis.

We apply the same learning rate as in [5],  $\eta = \frac{1}{L\sqrt{T}}$ ,

$$2(\mathcal{L}_0 - \mathcal{L}_*) \geq \left( \frac{2}{L\sqrt{T}} - \frac{1}{LT} \right) \mathbb{E} \left( \sum_t \|\mathbf{g}_t\|^2 \right) - \frac{T\xi^2}{BLT} \geq \frac{\sqrt{T}}{L} \mathbb{E} \left( \frac{1}{T} \sum_t \|\mathbf{g}_t\|^2 \right) - \frac{\xi^2}{BL}$$

and finally

$$\min_t \mathbb{E}(\|\mathbf{g}_t\|^2) \leq \mathbb{E} \left( \frac{1}{T} \sum_t \|\mathbf{g}_t\|^2 \right) \leq \frac{1}{\sqrt{T}} \left[ 2(\mathcal{L}_0 - \mathcal{L}_*)L + \frac{\xi^2}{B} \right]$$

Using the Jensen's inequality, we can have

$$\min_t \mathbb{E}(\|\mathbf{g}_t\|) \leq \frac{1}{T^{1/4}} \sqrt{2(\mathcal{L}_0 - \mathcal{L}_*)L + \frac{\xi^2}{B}}$$

□

## E Auxiliary proofs

### E.1 Proof of Theorem 7

*Proof.* We first show  $\frac{df(c,S;\Gamma)}{dS} < 0$  for all  $0 < c < 1$ ,  $\Gamma > 0$  and  $S > 0$ , as visualized in the left plot of Figure 9. We can explicitly write down the derivative, by WolframAlpha

$$\frac{df(c,S;\Gamma)}{dS} = \frac{-(A\Gamma^2 + B\Gamma + C)}{\sqrt{S^2 - 2cS + 1} \sqrt{S^2 + 2cS + 1} (\Gamma + \sqrt{S^2 - 2cS + 1})^2 (\Gamma + \sqrt{S^2 + 2cS + 1})^2} \quad (\text{E.1})$$

698 with

$$\begin{aligned} A(c, S) &= \sqrt{S^2 + 2cS + 1} (3c^2S - 2c(S^2 + 1) + S) + \sqrt{S^2 - 2cS + 1} (3c^2S + 2c(S^2 + 1) + S) \\ B(c, S) &= 4S \left[ (S^2 + 1)(1 - c^2) + c^2 \sqrt{S^2 + 2cS + 1} \sqrt{S^2 - 2cS + 1} \right] \\ C(c, S) &= (1 - c^2)S \left[ (S^2 - 2cS + 1)^{3/2} + (S^2 + 2cS + 1)^{3/2} \right] \end{aligned}$$

699 It is obvious that, since  $c < 1$ ,

$$S^2 \pm 2cS + 1 > S^2 \pm 2cS + c^2 = (S \pm c)^2 \geq 0. \quad (\text{E.2})$$

700 From (E.2), the denominator in (E.1) is positive and it suffices to show  $A\Gamma^2 + B\Gamma + C > 0$  for all  
701  $0 < c < 1$  and  $S > 0$ , in order to show  $\frac{df}{dS} < 0$ .

702 Also from (E.2), we can easily see  $B(c, S) > 0$  and  $C(c, S) > 0$ . We will show that  $A(c, S) > 0$  in  
703 Lemma E.1, after very heavy algebraic computation.

704 Now we can claim that  $A\Gamma^2 + B\Gamma + C > 0$  by Fact E.3, and complete the proof of the first statement.

To further see that  $\min_c f(c, S; \Gamma)$  is decreasing in  $S$ , let us denote  $c^*(x; \Gamma) := \arg \min_{c \in [0, 1]} f(c, x; \Gamma)$ . Then considering  $S < S'$ , we prove the second statement by observing

$$\min_c f(c, S; \Gamma) = f(c^*(S; \Gamma), S; \Gamma) > f(c^*(S; \Gamma), S'; \Gamma) \geq \min_c f(c, S'; \Gamma).$$

705 This statement is also visualized in the right plot of Figure 9.

706 We next show  $\frac{df(c, S; \Gamma)}{dc} < 0$  for all  $0 < c < 1, \Gamma > 0$  and  $S > 1$ . We can explicitly write down the  
707 derivative, by WolframAlpha

$$\frac{df(c, S; \Gamma)}{dc} = \frac{-S(A'\Gamma^2 + B'\Gamma + C')}{\sqrt{S^2 - 2cS + 1}\sqrt{S^2 + 2cS + 1}(\Gamma + \sqrt{S^2 - 2cS + 1})^2(\Gamma + \sqrt{S^2 + 2cS + 1})^2} \quad (\text{E.3})$$

708 with

$$\begin{aligned} A'(c, S) &= \left[ (S^2 + 3cS + 2)\sqrt{S^2 - 2cS + 1} - (S^2 - 3cS + 2)\sqrt{S^2 + 2cS + 1} \right] \\ B'(c, S) &= 4Sc \left[ \sqrt{S^2 + 2cS + 1}\sqrt{S^2 - 2cS + 1} + (S^2 - 1) \right] \\ C'(c, S) &= S \left[ (c + S)(S^2 - 2cS + 1)^{3/2} + (c - S)(S^2 + 2cS + 1)^{3/2} \right] \end{aligned}$$

709 Clearly  $B'(c, S) > 0$  and  $C'(c, S) > 0$ , since  $S^2 + 2cS + 1 > S^2 - 2cS + c^2 = (S - c)^2 \geq 0$ . And  
710 we will show  $A'(c, S) > 0$  in Lemma E.2, after some algebra.

711 We again claim that  $A'\Gamma^2 + B'\Gamma + C' > 0$  by Fact E.3, which guarantees that the numerator in (E.3)  
712 is negative and that  $\frac{df}{dc} < 0$ . This is visualized in Figure 10.  $\square$

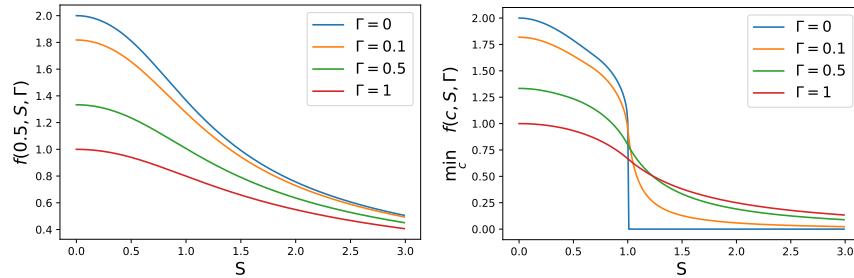

Figure 9: Visualization of  $f(0.5, S, \Gamma)$  (left) and  $\min_{0 \leq c \leq 1} f(c, S, \Gamma)$  over  $S > 0$ .

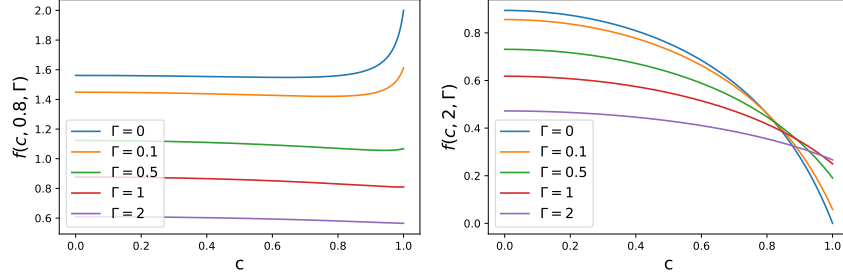

Figure 10: Visualization of  $f(c, 0.8, \Gamma)$  (left) and  $f(c, 2, \Gamma)$  over  $0 \leq c \leq 1$ .

## 713 E.2 Proof of Lemma E.1

**Lemma E.1.** For all  $0 < c < 1$  and  $S > 0$ ,

$$A := \sqrt{S^2 + 2cS + 1} (3c^2S - 2c(S^2 + 1) + S) + \sqrt{S^2 - 2cS + 1} (3c^2S + 2c(S^2 + 1) + S) > 0.$$

*Proof.* We prove by contradiction. Suppose

$$\sqrt{S^2 + 2cS + 1} (3c^2S - 2c(S^2 + 1) + S) + \sqrt{S^2 - 2cS + 1} (3c^2S + 2c(S^2 + 1) + S) < 0.$$

Then

$$0 < \sqrt{S^2 - 2cS + 1} (3c^2S + 2c(S^2 + 1) + S) < -\sqrt{S^2 + 2cS + 1} (3c^2S - 2c(S^2 + 1) + S).$$

714 where the first inequality comes from  $S^2 - 2cS + 1 > S^2 - 2cS + c^2 = (S - c)^2 \geq 0$ .

Squaring everything gives

$$(S^2 - 2cS + 1) (3c^2S + 2c(S^2 + 1) + S)^2 < (S^2 + 2cS + 1) (3c^2S - 2c(S^2 + 1) + S)^2.$$

Taking the difference gives

$$4cS(2 + 3S^2 - 9c^4S^2 + 2S^4 + 2c^2(1 - S^2 + S^4)) < 0$$

Given that  $c > 0, S > 0$ , we have

$$2 + 3S^2 - 9c^4S^2 + 2S^4 + 2c^2(1 - S^2 + S^4) < 0$$

Denoting  $X := S^2$  and viewing the above as a quadratic polynomial of  $X$ , we have

$$\underbrace{(2c^2 + 2)X^2 + (3 - 2c^2 - 9c^4)X + (2c^2 + 2)}_{\textcircled{1}} < 0$$

Using the closed-form minimizer of quadratic polynomial  $\textcircled{1}$ , after some heavy algebra, one can check the minimum of  $\textcircled{1}$  is

$$\frac{(1 + 3c^2)^2(1 - c^2)(7 + 9c^2)}{8(1 + c^2)}$$

715 which is clearly positive. Contradiction! □

## 716 E.3 Proof of Lemma E.2

**Lemma E.2.** For all  $0 < c < 1$  and  $S > 1$ ,

$$(S^2 + 3cS + 2)\sqrt{S^2 - 2cS + 1} - (S^2 - 3cS + 2)\sqrt{S^2 + 2cS + 1} > 0.$$

717 *Proof.* Notice that  $(S^2 + 3cS + 2) > S^2 + 2 > 0$  and  $\sqrt{S^2 \pm 2cS + 1} > 0$ . Therefore if  $S^2 - 3cS +$   
718  $2 \leq 0$ , we are done.

Otherwise, we prove by contradiction and suppose

$$0 < (S^2 + 3cS + 2)\sqrt{S^2 - 2cS + 1} < (S^2 - 3cS + 2)\sqrt{S^2 + 2cS + 1}.$$

under the condition that  $S^2 - 3cS + 2 > 0$ .

Squaring everything gives

$$(S^2 + 3cS + 2)^2(S^2 - 2cS + 1) < (S^2 - 3cS + 2)^2(S^2 + 2cS + 1).$$

Taking the difference gives

$$cS(8 + 20S^2 - 36c^2S^2 + 8S^4) < 0$$

Given that  $c > 0, S > 0$ , we have

$$2 + 5S^2 - 9c^2S^2 + 2S^4 < 0$$

Denoting  $X := S^2$  and viewing the above as a quadratic polynomial of  $X$ , we have, for  $X > 1$ ,

$$\underbrace{2X^2 + (5 - 9c^2)X + 2}_{\textcircled{2}} < 0$$

The closed-form minimizer of quadratic polynomial  $\textcircled{2}$  is  $\frac{(9c^2-5)}{4}$ . Given that  $0 < c < 1$ , we must have  $-\frac{5}{4} < \frac{9c^2-5}{4} < 1$ . Hence the minimizer is not within the feasible domain  $(1, \infty)$  of  $X$ . Thus the minimum of  $\textcircled{2}$  is achieved with  $X = 1$  at  $9(1 - c^2)$ . This is positive. Contradiction!  $\square$

#### E.4 Proof of Fact E.3

**Fact E.3.** For a quadratic polynomial  $Ax^2 + Bx + C$  with  $A, B, C > 0$ , the minimum value on the domain  $x \geq 0$  is  $C$ , at  $x = 0$ . Therefore  $Ax^2 + Bx + C > 0$ .

*Proof.* Since  $A > 0$ , the quadratic polynomial is convex and increasing on the domain  $x > -\frac{B}{2A}$ . Since  $B > 0$  as well, we know  $-\frac{B}{2A} < 0$  and hence the quadratic polynomial is strictly increasing on  $x > 0$ . Therefore the minimum value is achieved when  $x = 0$ , and we obtain  $Ax^2 + Bx + C \geq C > 0$  for all  $x \geq 0$ .  $\square$

## F Examples of lazy regions

### F.1 Balanced binary classification

We describe the data generation in Section 3.3. The label is uniformly  $\pm 1$ , that is  $\mathbb{P}(y_i = +1) = \mathbb{P}(y_i = -1) = 0.5$ . We have 10000 positive and negative samples  $x_i \sim \mathcal{N}(y_i, 1)$ . We consider a logistic regression model  $\mathbb{P}(Y = y|x) = \mathbb{I}(y = 1) \cdot \text{Sigmoid}(x + \theta) + \mathbb{I}(y = -1) \cdot (1 - \text{Sigmoid}(x + \theta)) = \frac{1}{1 + e^{-y(\theta + x)}}$ , where  $\theta \in \mathbb{R}$  is the intercept. The gradient with respect to this only trainable parameter is  $\frac{\partial \mathcal{L}_i}{\partial \theta} = -y \left(1 - \frac{1}{1 + e^{-y(\theta + x)}}\right)$ . We set the clipping threshold  $R = 0.01$  and the stability constant  $\gamma = 0.01$ .

### F.2 Mean estimation on Gaussian mixture data

We also observe the lazy region issue in the mean estimation problem  $\min_{\theta} \frac{1}{2} \|\theta - x_i\|^2$ . Here  $\mathbb{P}(x_i \sim \mathcal{N}(4, 1)) = \mathbb{P}(x_i \sim \mathcal{N}(-4, 1)) = 0.5$ . We have 10000 samples from each Gaussian distribution. The regular minimum is clearly  $\sum_i x_i \rightarrow 0$ , where the regular gradient and AUTO-S clipped gradient vanish. Yet both AUTO-V and Abadi's clipping lose motivation to update the mean estimator on the interval  $(-1, 1)$ . We set the clipping threshold  $R = 0.01$  and the stability constant  $\gamma = 0.1$ .

## G Experiments settings

### G.1 Image classification settings

We give the experiments settings for computer vision tasks in Table 1.

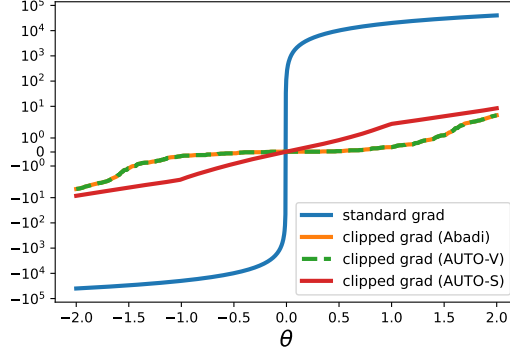

Figure 11: Scalar gradient  $\frac{\partial \mathcal{L}}{\partial \theta}$  at each  $\theta$ .

- **MNIST**: We use the network architecture from [53, 65, 61], with 40 epochs, 512 batch size, 0.5 learning rate (or 0.005 non-DP learning rate), 0.1 clipping threshold, DP-SGD with 0.9 momentum, and without pretraining. This setting is the same as [65].
- **FashionMNIST**: We use the same network architecture as MNIST, with 40 epochs, 2048 batch size, 4 learning rate (or 0.04 non-DP learning rate), DP-SGD with 0.9 momentum, and without pretraining. This setting is the same as [65].
- **CIFAR10 pretrained**: We use the SimCLR model from [13]<sup>10</sup>, with 50 epochs, 1024 batch size, 4 learning rate (or 0.04 non-DP learning rate), 0.1 clipping threshold, and DP-SGD with 0.9 momentum. The SimCLR model is pretrained on unlabelled ImageNet dataset. After pretraining, we obtain a feature of dimension 4096 on which a linear classifier is trained privately. This setting is the same as [65].
- **ImageNette**: We use the ResNet9 (2.5 million parameters) with Mish activation function [50]. We set 50 epochs, 1000 batch size, 0.0005 learning rate (or 0.000005 non-DP learning rate), 1.5 clipping threshold, and use DP-NAdam, without pretraining. This setting is the same as [35] except we did not apply the learning rate decaying scheduler.
- **CelebA (Smiling and Male and Multi-label)** We use the same ResNet9 as above, with 10 epochs, 500 batch size, 0.001 DP learning rate (or 0.00001 non-DP learning rate), 0.1 clipping threshold, and use DP-Adam, without pretraining. We use the labels ‘Smiling’ and ‘Male’ for two binary classification tasks, with cross-entropy loss. For the multi-label task uses a scalar loss by summing up the 40 binary cross-entropy losses from each label.

We refer the code for MNIST, FashionMNIST, CIFAR10, CIFAR10 pretrained to <https://github.com/ftramer/Handcrafted-DP> by [65]. ResNet9 can be found in <https://github.com/cbenitez81/Resnet9>.

Throughout all experiments, we do not apply tricks such as random data augmentation (single or multiple times [16]), weight standardization [58], or parameter averaging [57].

## G.2 Sentence classification settings

We experiment on five datasets in Table 2 and Table 3.

- **MNLI(m)** MNLI-matched, the matched validation and test splits from Multi-Genre Natural Language Inference Corpus.
- **MNLI(mm)** MNLI-mismatched, the matched validation and test splits from Multi-Genre Natural Language Inference Corpus.
- **QQP** The Quora Question Pairs2 dataset.
- **QNLI** The Stanford Question Answering dataset.
- **SST2** The Stanford Sentiment Treebank dataset.

<sup>10</sup>See implementation in <https://github.com/google-research/simclr>.

The datasets are processed and loaded from Huggingface [38], as described in <https://huggingface.co/datasets/glue>. We follow the same setup as [74] and [40]. We refer the interested readers to Appendix G,H,I,K,N of [40] for more details.

We emphasize that our automatic clipping uses exactly the same hyperparameters as the Abadi’s clipping in [40], which is released in their Private-Transformers library <sup>11</sup>.

| Dataset                | MNLI(m/mm) | QQP  | QNLI | SST2 |
|------------------------|------------|------|------|------|
| Epoch                  | 18         | 18   | 6    | 3    |
| Batch size             | 6000       | 6000 | 2000 | 1000 |
| clipping threshold $R$ | 0.1        | 0.1  | 0.1  | 0.1  |
| DP learning rate       | 5e-4       | 5e-4 | 5e-4 | 5e-4 |
| non-DP learning rate   | 5e-5       | 5e-5 | 5e-5 | 5e-5 |
| learning rate decay    | Yes        | Yes  | Yes  | Yes  |
| AdamW weight decay     | 0          | 0    | 0    | 0    |
| Max sequence length    | 256        | 256  | 256  | 256  |

Table 5: Hyperparameters of automatic clipping and Abadi’s clipping, for sentence classification in Table 2 and Table 3, using either RoBERTa base or large.

786

787 Notice that we use DP learning rate 5e-4 across tasks for the  $R$ -dependent automatic DP-Adam, which  
 788 is equivalent to  $R$ -independent automatic DP-Adam with the same learning rate. We demonstrate  
 789 that the results are not sensitive to learning rates around the optimal choice. That is, the automatic  
 clipping does not eliminate  $R$  at the cost of more difficult tuning of learning rate.

| learning rate | 1e-4  | 3e-4  | 5e-4  | 8e-4  | 1e-3  |
|---------------|-------|-------|-------|-------|-------|
| RoBERTa-base  | 93.92 | 94.38 | 94.49 | 94.72 | 93.35 |
| RoBERTa-large | 95.76 | 96.21 | 96.21 | 96.33 | 95.99 |

Table 6: SST2 accuracy with respect to learning rate.

790

### 791 G.3 Table-to-text generation settings

792 We experiment multiple GPT2 models on E2E dataset from Huggingface [38] in Table 4. We follow  
 793 the same setup as [40], and our automatic clipping uses exactly the same hyperparameters as the  
 794 Abadi’s clipping in [40], which is released in their Private-Transformer library <sup>12</sup>.

| Model                  | GPT2 | GPT2 medium | GPT2 large |
|------------------------|------|-------------|------------|
| Epoch                  | 10   | 10          | 10         |
| Batch size             | 1024 | 1024        | 1024       |
| clipping threshold $R$ | 0.1  | 0.1         | 0.1        |
| DP learning rate       | 2e-3 | 2e-3        | 2e-3       |
| non-DP learning rate   | 2e-4 | 1e-4        | 1e-4       |
| learning rate decay    | No   | No          | No         |
| AdamW weight decay     | 0.01 | 0.01        | 0.01       |
| Max sequence length    | 100  | 100         | 100        |

Table 7: Hyperparameters of automatic clipping and Abadi’s clipping, for the E2E generation task in Table 4.

<sup>11</sup>See [https://github.com/lxuechen/private-transformers/blob/main/examples/classification/run\\_wrapper.py](https://github.com/lxuechen/private-transformers/blob/main/examples/classification/run_wrapper.py)

<sup>12</sup>See <https://github.com/lxuechen/private-transformers/blob/main/examples/table2text/run.sh>

## Figure zoo

### H.1 Frequency of clipping

We show that in all sentence classification tasks, Abadi’s clipping happens on a large proportion of per-sample gradients. This supports the similarity between Abadi’s clipping and AUTO-V in (3.1).

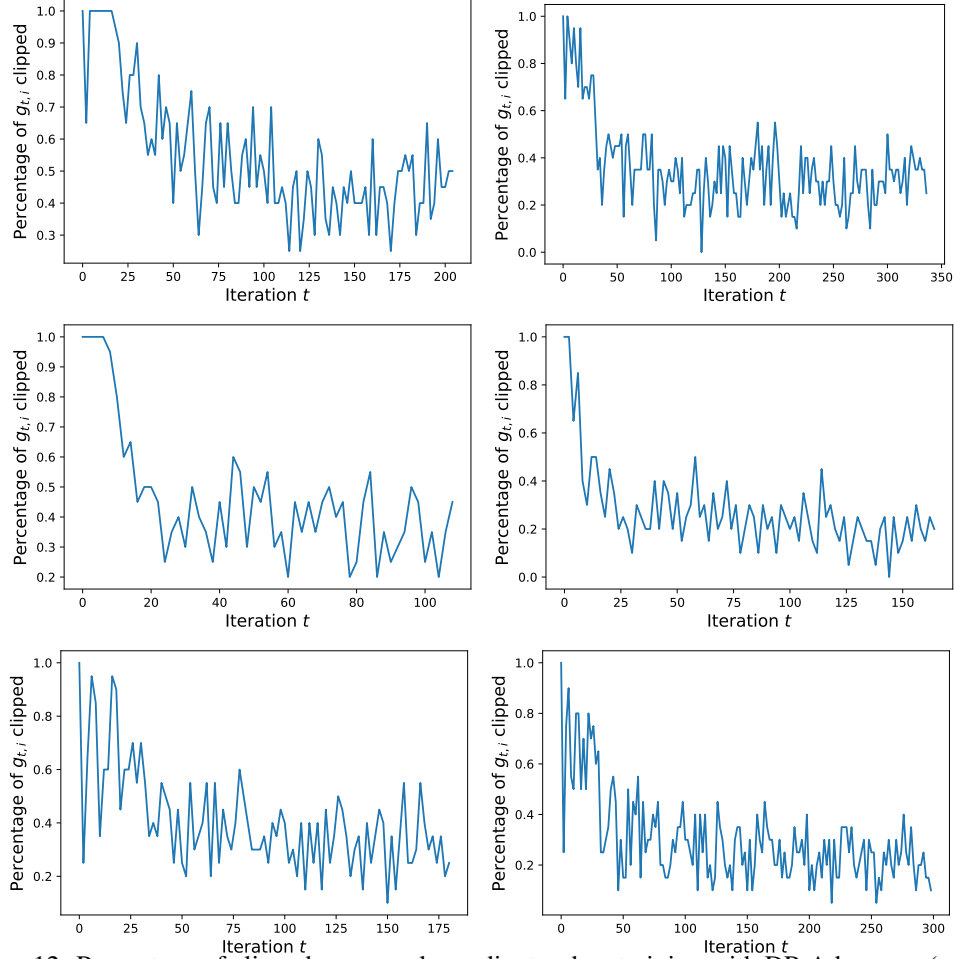

Figure 12: Percentage of clipped per-sample gradients when training with DP-Adam<sub>Abadi</sub> ( $\epsilon = 3$ ), as in Section 6.2. Left panel is RoBERTa-base and right panel is RoBERTa-large. Top row: MNLI. Middle row: QNLI. Bottom row: QQP.

We note that for GPT2, GPT2 medium and GPT2 large, empirically in all iterations 100% of the per-sample gradients are clipped by the Abadi’s clipping, making the performance of Abadi’s clipping equivalent to AUTO-V clipping, as shown in Table 4.

### H.2 Stability constant helps AUTO clipping reduce gradient norm

To corroborate our claim in Theorem 6, that the stability  $\gamma$  reduces the gradient norm, we plot the actual gradient norm by iteration.

### H.3 Choice of stability constant is robust

We claim in Theorem 6 that, as long as  $\gamma > 0$  in our automatic clipping, the asymptotic convergence rate of gradient norm is the same as that by standard non-private SGD. We plot the ablation study of learning rate and the stability constant  $\gamma$  to show that it is easy to set  $\gamma$ : in Table 2 and Table 3,

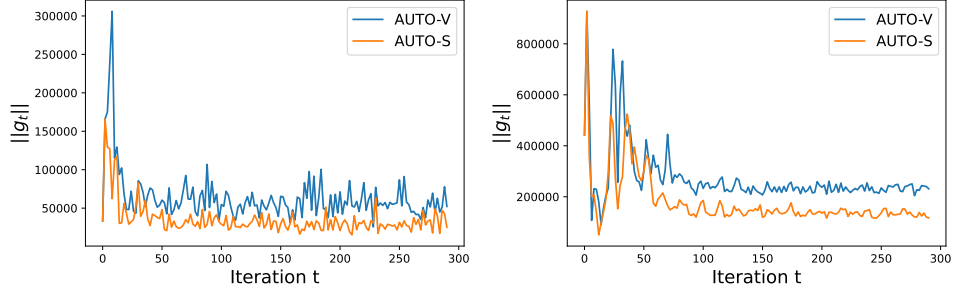

Figure 13: Gradient norm by different automatic clipping methods, on SST2 (left) and MNLI (right), trained with RoBERTa-base.

we adopt learning rate 0.0005, under which a wide range of  $0.0001 < \gamma < 1$  gives similar accuracy. Note that the largest good  $\gamma$  is 1000 times bigger than the smallest good  $\gamma$ .

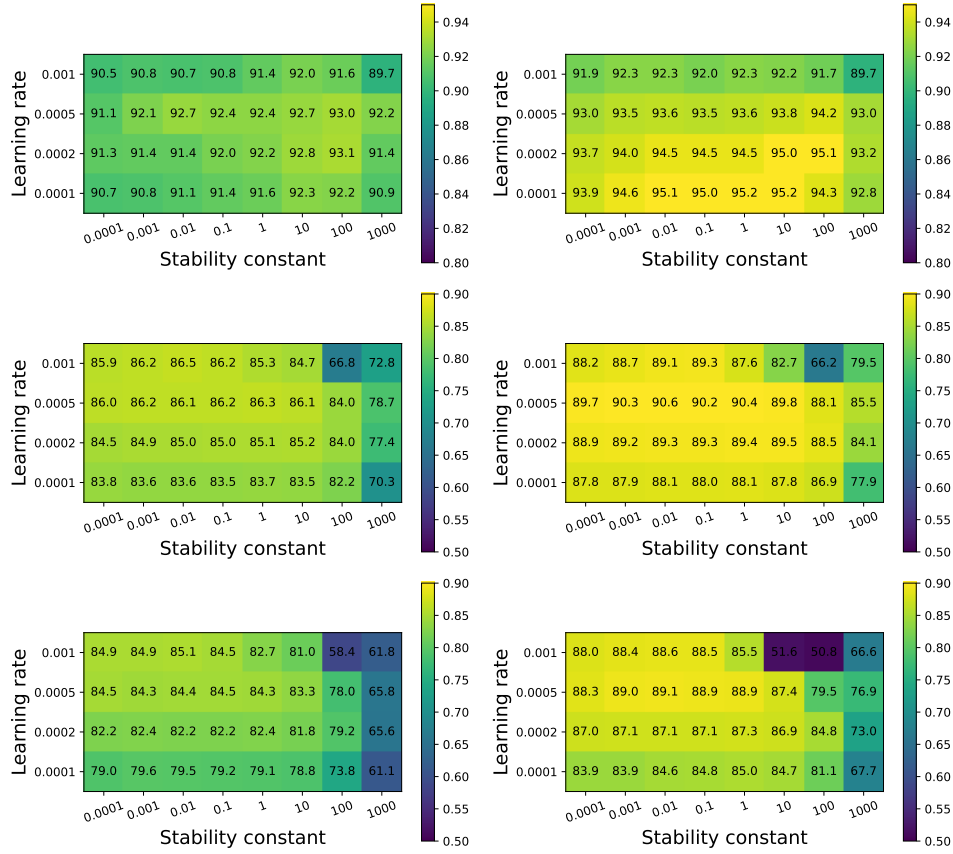

Figure 14: Test accuracy by different stability constant  $\gamma$  and learning rate  $\eta$  in automatic clipping ( $\epsilon = 3$ ). Upper row: SST2 for full 3 epochs. Middle row: QNLI for full 6 epochs. Lower row: QNLI for one epoch. Trained with RoBERTa-base (left) and RoBERTa-large (right).

#### H.4 Automatic clipping avoids ablation study

We plot the ablation study of learning rate and clipping threshold in Abadi’s clipping below. This demonstrates that, AUTO-S clipping only requires 1D grid search to tune the learning rate, avoiding the expensive 2D grid search that is unfortunately necessary for the Abadi’s clipping. Hence our automatic clipping can save the tuning effort substantially.

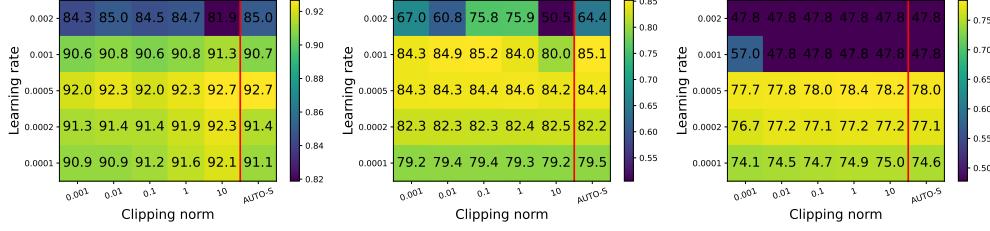

Figure 15: Test accuracy by different clipping threshold  $R$  in DP-Adam<sub>Abadi</sub> and learning rate  $\eta$ , on SST2 (left, 3 epochs) / QNLI (middle, 1 epoch) / MNLI (right, 1 epoch),  $\epsilon = 3$ , trained with RoBERTa-base.

## I Full table of GPT2 generation task on E2E dataset

This is the extended version of Table 4 on E2E dataset. The performance measures are BLEU [54], ROUGE-L [41], NIST [60], METEOR [4], and CIDEr [67] scores. Here  $\epsilon$  is accounted by RDP [49], where  $\epsilon = 3$  corresponds to 2.68 if accounted by Gaussian DP [18, 7] or to 2.75 if accounted by numerical composition [29], and  $\epsilon = 8$  corresponds to 6.77 if accounted by Gaussian DP or to 7.27 if accounted by numerical composition.

| Metric  | DP guaranteee  | GPT2 large    | GPT2 medium   | GPT2          |               |               |               |        |        |        |         |
|---------|----------------|---------------|---------------|---------------|---------------|---------------|---------------|--------|--------|--------|---------|
|         |                | full          | full          | full          | full          | full          | LoRA          | RGP    | prefix | top2   | retrain |
|         |                | AUTO-S        | AUTO-S        | AUTO-S        | AUTO-V        | [40]          | [32]          | [74]   | [39]   | [40]   | [40]    |
| BLEU    | $\epsilon = 3$ | <b>64.180</b> | <b>63.850</b> | <b>61.340</b> | <b>61.519</b> | <b>61.519</b> | 58.153        | 58.482 | 47.772 | 25.920 | 15.457  |
|         | $\epsilon = 8$ | <b>64.640</b> | <b>64.220</b> | <b>63.600</b> | 63.189        | 63.189        | <b>63.389</b> | 58.455 | 49.263 | 26.885 | 24.247  |
|         | non-DP         | 66.840        | 68.500        | 69.463        | 69.463        | 69.463        | 69.682        | 68.328 | 68.845 | 65.752 | 65.731  |
| ROUGE-L | $\epsilon = 3$ | <b>67.857</b> | <b>67.071</b> | <b>65.872</b> | 65.670        | 65.670        | <b>65.773</b> | 65.560 | 58.964 | 44.536 | 35.240  |
|         | $\epsilon = 8$ | <b>68.968</b> | <b>67.533</b> | <b>67.073</b> | 66.429        | 66.429        | <b>67.525</b> | 65.030 | 60.730 | 46.421 | 39.951  |
|         | non-DP         | 70.384        | 71.458        | 71.359        | 71.359        | 71.359        | 71.709        | 68.844 | 70.805 | 68.704 | 68.751  |
| NIST    | $\epsilon = 3$ | <b>7.937</b>  | <b>7.106</b>  | <b>7.071</b>  | <b>6.697</b>  | <b>6.697</b>  | 5.463         | 5.775  | 5.249  | 1.510  | 0.376   |
|         | $\epsilon = 8$ | <b>8.301</b>  | <b>8.172</b>  | <b>7.714</b>  | 7.444         | 7.444         | <b>7.449</b>  | 6.276  | 5.525  | 1.547  | 1.01    |
|         | non-DP         | 8.730         | 8.628         | 8.780         | 8.780         | 8.780         | 8.822         | 8.722  | 8.722  | 8.418  | 8.286   |
| METEOR  | $\epsilon = 3$ | <b>0.403</b>  | <b>0.387</b>  | <b>0.387</b>  | <b>0.384</b>  | <b>0.384</b>  | 0.370         | 0.331  | 0.363  | 0.197  | 0.113   |
|         | $\epsilon = 8$ | <b>0.420</b>  | <b>0.418</b>  | <b>0.404</b>  | 0.400         | 0.400         | <b>0.407</b>  | 0.349  | 0.364  | 0.207  | 0.145   |
|         | non-DP         | 0.460         | 0.449         | 0.461         | 0.461         | 0.461         | 0.463         | 0.456  | 0.445  | 0.443  | 0.429   |
| CIDEr   | $\epsilon = 3$ | <b>2.008</b>  | <b>1.754</b>  | <b>1.801</b>  | <b>1.761</b>  | <b>1.761</b>  | 1.581         | 1.300  | 1.507  | 0.452  | 0.116   |
|         | $\epsilon = 8$ | <b>2.163</b>  | <b>2.081</b>  | <b>1.938</b>  | 1.919         | 1.919         | <b>1.948</b>  | 1.496  | 1.569  | 0.499  | 0.281   |
|         | non-DP         | 2.356         | 2.137         | 2.422         | 2.422         | 2.422         | 2.491         | 2.418  | 2.345  | 2.180  | 2.004   |

Table 8: Test performance on E2E dataset with GPT2. The best two GPT2 models for each row are marked in bold.

We observe that GPT2 (163 million parameters), GPT2-medium (406 million), and GPT2-large (838 million), Table 4 trained with our automatic clipping consistently perform better in comparison to other methods. In some cases, LoRA trained with Abadi’s clipping also demonstrates strong performance and it would be interesting to see how LoRA trained with the automatic clipping will behave.

## J Further experiments on CelebA dataset

In this section, we present a complete summary of accuracy results, with DP constraint or not, for the CelebA dataset. We do not apply any data-preprocessing. In the first experiment, we apply a single ResNet on the 40 labels as the multi-task/multi-label learning. In the second experiment, we apply one ResNet on one label. As expected, our automatic DP optimizers have comparable test accuracy to the Abadi’s DP optimizers, but we do not need to tune the clipping threshold for each individual task/label. We also notice that, learning different labels separately gives better accuracy than learning all labels together, though at the cost of heavier computational burden.

## 835 J.1 Multi-label classification

836 We apply ResNet9 as in Appendix G.1 on the multi-label classification task. I.e. the output layer has  
837 40 neurons, each corresponding to one sigmoid cross-entropy loss, that are summed to a single loss  
838 and all labels are learnt jointly.

| Index | Attributes          | Abadi's<br>$\epsilon = 3$ | AUTO-S<br>$\epsilon = 3$ | Abadi's<br>$\epsilon = 8$ | AUTO-S<br>$\epsilon = 8$ | non-DP<br>$\epsilon = \infty$ |
|-------|---------------------|---------------------------|--------------------------|---------------------------|--------------------------|-------------------------------|
| 0     | 5 o Clock Shadow    | 90.64                     | 90.99↑                   | 90.81                     | 91.28↑                   | 93.33                         |
| 1     | Arched Eyebrows     | 75.15                     | 76.31↑                   | 76.84                     | 77.11↑                   | 81.52                         |
| 2     | Attractive          | 75.85                     | 76.10↑                   | 77.50                     | 77.74↑                   | 81.15                         |
| 3     | Bags Under Eyes     | 80.75                     | 81.12↑                   | 82.15                     | 82.13↓                   | 84.81                         |
| 4     | Bald                | 97.84                     | 97.87↑                   | 98.04                     | 97.98↓                   | 98.58                         |
| 5     | Bangs               | 92.71                     | 92.68↓                   | 93.46                     | 93.55↑                   | 95.50                         |
| 6     | Big Lips            | 67.51                     | 67.78↑                   | 68.34                     | 68.44↑                   | 71.33                         |
| 7     | Big Nose            | 78.01                     | 80.23↑                   | 76.69                     | 80.59↑                   | 83.54                         |
| 8     | Black Hair          | 81.92                     | 80.95↓                   | 83.33                     | 83.28↓                   | 88.55                         |
| 9     | Blond Hair          | 92.25                     | 92.38↑                   | 93.52                     | 93.09↓                   | 95.49                         |
| 10    | Blurry              | 94.91                     | 94.82↓                   | 95.08                     | 94.90↓                   | 95.78                         |
| 11    | Brown Hair          | 80.13                     | 82.50↑                   | 83.74                     | 83.89↑                   | 87.79                         |
| 12    | Bushy Eyebrows      | 88.06                     | 88.23↑                   | 89.72                     | 88.80↓                   | 92.19                         |
| 13    | Chubby              | 94.72                     | 94.54↓                   | 94.54                     | 94.50↓                   | 95.56                         |
| 14    | Double Chin         | 95.19                     | 95.49↑                   | 95.50                     | 95.51↑                   | 96.09                         |
| 15    | Eyeglasses          | 97.06                     | 97.64↑                   | 98.32                     | 98.06↓                   | 99.39                         |
| 16    | Goatee              | 95.68                     | 95.45↓                   | 95.84                     | 95.87↑                   | 97.06                         |
| 17    | Gray Hair           | 96.77                     | 96.79↑                   | 97.02                     | 97.03↑                   | 98.06                         |
| 18    | Heavy Makeup        | 84.96                     | 85.70↑                   | 87.58                     | 87.29↓                   | 90.76                         |
| 19    | High Cheekbones     | 81.46                     | 81.42↓                   | 82.62                     | 82.72↑                   | 86.62                         |
| 20    | Male                | 92.05                     | 92.17↑                   | 93.32                     | 93.17↓                   | 97.46                         |
| 21    | Mouth Slightly Open | 86.20                     | 86.32↑                   | 87.84                     | 88.48↑                   | 93.07                         |
| 22    | Mustache            | 96.05                     | 95.96↓                   | 96.08                     | 95.99↓                   | 96.74                         |
| 23    | Narrow Eyes         | 84.90                     | 84.78↓                   | 85.14                     | 85.18↑                   | 86.98                         |
| 24    | No Beard            | 91.55                     | 91.67↑                   | 92.29                     | 92.45↑                   | 95.18                         |
| 25    | Oval Face           | 71.26                     | 71.42↑                   | 71.98                     | 71.25↓                   | 74.62                         |
| 26    | Pale Skin           | 96.09                     | 96.04↓                   | 96.15                     | 96.17↑                   | 96.93                         |
| 27    | Pointy Nose         | 70.34                     | 72.11↑                   | 72.23                     | 73.01↑                   | 75.68                         |
| 28    | Receding Hairline   | 91.53                     | 91.37↓                   | 91.75                     | 91.74↓                   | 92.87                         |
| 29    | Rosy Cheeks         | 93.26                     | 93.02↓                   | 93.56                     | 93.35↓                   | 94.86                         |
| 30    | Sideburns           | 96.16                     | 96.09↓                   | 96.27                     | 96.46↑                   | 97.44                         |
| 31    | Smiling             | 86.39                     | 87.08↑                   | 88.87                     | 88.63↓                   | 92.25                         |
| 32    | Straight Hair       | 76.20                     | 77.95↑                   | 78.78                     | 78.52↓                   | 80.66                         |
| 33    | Wavy Hair           | 70.30                     | 71.79↑                   | 73.58                     | 73.19↓                   | 79.15                         |
| 34    | Wearing Earrings    | 80.53                     | 81.52↑                   | 82.29                     | 82.20↓                   | 87.56                         |
| 35    | Wearing Hat         | 96.99                     | 96.83↓                   | 97.46                     | 97.31↓                   | 98.68                         |
| 36    | Wearing Lipstick    | 88.95                     | 88.04↓                   | 89.87                     | 90.72↑                   | 93.49                         |
| 37    | Wearing Necklace    | 84.59                     | 85.83↑                   | 85.93                     | 85.42↓                   | 86.61                         |
| 38    | Wearing Necktie     | 93.91                     | 93.91–                   | 94.43                     | 94.08↓                   | 96.30                         |
| 39    | Young               | 81.35                     | 81.21↓                   | 82.18                     | 82.52↑                   | 87.18                         |

Table 9: Accuracy on CelebA dataset with settings in Appendix G.1 from one run. The green arrow indicates AUTO-S is better than Abadi's clipping under the same  $\epsilon$ ; the red arrow indicates otherwise; the black bar indicates the same accuracy.

## 839 J.2 Multiple binary classification

840 For the second experiment, we apply ResNet9 on each label as a binary classification task. I.e. the output layer has 1 neuron and we run 40 different models for all labels separately.

| Index | Attributes          | Abadi's<br>Single<br>$\epsilon = 8$ | AUTO-S<br>Single<br>$\epsilon = 8$ | Abadi's<br>Multi<br>$\epsilon = 8$ | AUTO-S<br>Multi<br>$\epsilon = 8$ | non-DP<br>Multi<br>$\epsilon = \infty$ |
|-------|---------------------|-------------------------------------|------------------------------------|------------------------------------|-----------------------------------|----------------------------------------|
| 0     | 5 o Clock Shadow    | 92.15                               | 92.29↑                             | 90.81                              | 91.28↑                            | 93.33                                  |
| 1     | Arched Eyebrows     | 81.18                               | 80.19↓                             | 76.84                              | 77.11↑                            | 81.52                                  |
| 2     | Attractive          | 79.31                               | 79.79↑                             | 77.50                              | 77.74↑                            | 81.15                                  |
| 3     | Bags Under Eyes     | 83.52                               | 83.48↓                             | 82.15                              | 82.13↓                            | 84.81                                  |
| 4     | Bald                | 97.89                               | 97.88↓                             | 98.04                              | 97.98↓                            | 98.58                                  |
| 5     | Bangs               | 94.52                               | 94.83↑                             | 93.46                              | 93.55↑                            | 95.50                                  |
| 6     | Big Lips            | 67.32                               | 67.53↑                             | 68.34                              | 68.44↑                            | 71.33                                  |
| 7     | Big Nose            | 82.31                               | 82.36↑                             | 76.69                              | 80.59↑                            | 83.54                                  |
| 8     | Black Hair          | 87.08                               | 86.93↓                             | 83.33                              | 83.28↓                            | 88.55                                  |
| 9     | Blond Hair          | 94.29                               | 94.73↑                             | 93.52                              | 93.09↓                            | 95.49                                  |
| 10    | Blurry              | 94.95                               | 95.20↑                             | 95.08                              | 94.90↓                            | 95.78                                  |
| 11    | Brown Hair          | 87.41                               | 87.19↓                             | 83.74                              | 83.89↑                            | 87.79                                  |
| 12    | Bushy Eyebrows      | 91.23                               | 91.43↑                             | 89.72                              | 88.80↓                            | 92.19                                  |
| 13    | Chubby              | 94.70                               | 94.70–                             | 94.54                              | 94.50↓                            | 95.56                                  |
| 14    | Double Chin         | 95.43                               | 95.43–                             | 95.50                              | 95.51↑                            | 96.09                                  |
| 15    | Eyeglasses          | 98.88                               | 99.14↑                             | 98.32                              | 98.06↓                            | 99.39                                  |
| 16    | Goatee              | 96.12                               | 96.07↓                             | 95.84                              | 95.87↑                            | 97.06                                  |
| 17    | Gray Hair           | 97.48                               | 97.34↓                             | 97.02                              | 97.03↑                            | 98.06                                  |
| 18    | Heavy Makeup        | 88.85                               | 88.72↓                             | 87.58                              | 87.29↓                            | 90.76                                  |
| 19    | High Cheekbones     | 85.66                               | 85.45↓                             | 82.62                              | 82.72↑                            | 86.62                                  |
| 20    | Male                | 95.42                               | 95.70↑                             | 95.53                              | 93.17↓                            | 97.46                                  |
| 21    | Mouth Slightly Open | 92.67                               | 92.74↑                             | 87.84                              | 88.48↑                            | 93.07                                  |
| 22    | Mustache            | 96.13                               | 96.13–                             | 96.08                              | 95.99↓                            | 96.74                                  |
| 23    | Narrow Eyes         | 85.13                               | 85.13–                             | 85.14                              | 85.18↑                            | 86.98                                  |
| 24    | No Beard            | 94.26                               | 94.58↑                             | 92.29                              | 92.45↑                            | 95.18                                  |
| 25    | Oval Face           | 70.77                               | 73.05↑                             | 71.98                              | 71.25↓                            | 74.62                                  |
| 26    | Pale Skin           | 96.38                               | 96.34↓                             | 96.15                              | 96.17↑                            | 96.93                                  |
| 27    | Pointy Nose         | 71.48                               | 73.37↑                             | 72.23                              | 73.01↑                            | 75.68                                  |
| 28    | Receding Hairline   | 91.51                               | 91.51–                             | 91.75                              | 91.74↓                            | 92.87                                  |
| 29    | Rosy Cheeks         | 93.26                               | 93.35↑                             | 93.56                              | 93.35↓                            | 94.86                                  |
| 30    | Sideburns           | 96.46                               | 96.34↓                             | 96.27                              | 96.46↑                            | 97.44                                  |
| 31    | Smiling             | 90.82                               | 90.87↑                             | 88.87                              | 88.63↓                            | 92.25                                  |
| 32    | Straight Hair       | 79.01                               | 79.01–                             | 78.78                              | 78.52↓                            | 80.66                                  |
| 33    | Wavy Hair           | 77.55                               | 78.83↑                             | 73.58                              | 73.19↓                            | 79.15                                  |
| 34    | Wearing Earrings    | 87.33                               | 87.50↑                             | 82.29                              | 82.20↓                            | 87.56                                  |
| 35    | Wearing Hat         | 98.04                               | 98.11↑                             | 97.46                              | 97.31↓                            | 98.68                                  |
| 36    | Wearing Lipstick    | 92.05                               | 90.46↓                             | 89.87                              | 90.72↑                            | 93.49                                  |
| 37    | Wearing Necklace    | 86.21                               | 86.21–                             | 85.93                              | 85.42↓                            | 86.61                                  |
| 38    | Wearing Necktie     | 95.85                               | 95.94↑                             | 94.43                              | 94.08↓                            | 96.30                                  |
| 39    | Young               | 85.19                               | 84.12↓                             | 82.18                              | 82.52↑                            | 87.18                                  |

Table 10: Accuracy on CelebA dataset with settings in Appendix G.1 from one run. ‘Single’ means each attribute is learned separately as a binary classification task. ‘Multi’ means all attributes are learned jointly as a multi-label classification task. The green arrow indicates AUTO-S is better than Abadi’s clipping under the same  $\epsilon$  and the same task; the red arrow indicates otherwise; the black bar indicates the same accuracy.

## 842 **K Code implementation of automatic clipping**

843 Changing Abadi’s clipping to automatic clipping is easy in available codebases. One can set the  
844 clipping  $R = 1$  or any other constant, as explained in Theorem 1 and Theorem 2.

### 845 **K.1 Opacus**

846 For Opacus [73] version 1.1.2 (latest), we can implement the all-layer automatic clipping by changing  
847 Line 399-401 in [https://github.com/pytorch/opacus/blob/main/opacus/optimizers/](https://github.com/pytorch/opacus/blob/main/opacus/optimizers/optimizer.py)  
848 [optimizer.py](https://github.com/pytorch/opacus/blob/main/opacus/optimizers/optimizer.py) to

```
849 per_sample_clip_factor = self.max_grad_norm / (per_sample_norms + 0.01)
```

850 The per-layer automatic clipping requires changing Line 61-63 in [https://github.com/pytorch/](https://github.com/pytorch/opacus/blob/main/opacus/optimizers/perlayeroptimizer.py)  
851 [opacus/blob/main/opacus/optimizers/perlayeroptimizer.py](https://github.com/pytorch/opacus/blob/main/opacus/optimizers/perlayeroptimizer.py) to

```
852 per_sample_clip_factor = max_grad_norm / (per_sample_norms + 0.01)
```

853 For older version ( $< 1.0$ , e.g. 0.15) of Opacus, we can implement the all-layer automatic clipping  
854 by changing Line 223-225 in [https://github.com/pytorch/opacus/blob/v0.15.0/opacus/](https://github.com/pytorch/opacus/blob/v0.15.0/opacus/opts/opts.py)  
855 [utils/clipping.py](https://github.com/pytorch/opacus/blob/v0.15.0/opacus/opts/opts.py) to

```
856 per_sample_clip_factor = self.flat_value / (norms[0] + 0.01)
```

857 or implement the per-layer automatic clipping by changing Line 301-302 in [https://github.com/](https://github.com/pytorch/opacus/blob/main/opacus/optimizers/perlayeroptimizer.py)  
858 [pytorch/opacus/blob/main/opacus/optimizers/perlayeroptimizer.py](https://github.com/pytorch/opacus/blob/main/opacus/optimizers/perlayeroptimizer.py) to

```
859 per_sample_clip_factor = threshold / (norm + 0.01)  
860 clipping_factor.append(per_sample_clip_factor)
```

### 861 **K.2 ObjAX**

862 For ObjAX version 1.6.0 (latest), we can implement the automatic clipping in [https://github.](https://github.com/google/objax/blob/master/objax/privacy/dpsgd/gradient.py)  
863 [com/google/objax/blob/master/objax/privacy/dpsgd/gradient.py](https://github.com/google/objax/blob/master/objax/privacy/dpsgd/gradient.py) by changing Line 92  
864 to

```
865 idivisor = self.l2_norm_clip / (total_grad_norm+0.01)
```

866 and changing Line 145 to

```
867 idivisor = self.l2_norm_clip/(grad_norms+0.01)
```

### 868 **K.3 Private-transformers**

869 To reproduce our experiments for sentence classification and table-to-text genera-  
870 tion, we modify the ‘private-transformers’ codebase of [40]. The modification is  
871 in [https://github.com/lxuechen/private-transformers/blob/main/private\\_](https://github.com/lxuechen/private-transformers/blob/main/private_transformers/privacy_utils/privacy_engine.py)  
872 [transformers/privacy\\_utils/privacy\\_engine.py](https://github.com/lxuechen/private-transformers/blob/main/private_transformers/privacy_utils/privacy_engine.py), by changing Line 349 to

```
873 return self.max_grad_norm / (norm_sample + 0.01)
```

874 and Line 510-512 to

```
875 coef_sample = self.max_grad_norm * scale / (norm_sample + 0.01)
```
